# Supplementary material
Source: HighWire-hosted journal article supplement (https://jnm.snmjournals.org/highwire/filestream/94528/field_highwire_adjunct_files/0/122333_Supplemental_Data.pdf)
Supplement: 122333_Supplemental_Data.pdf [file 122333_Supplemental_Data.pdf]

**Supplemental Table 1:** Detailed Patient Characteristics of Patients with Astrocytic Low-Grade Glioma

| Patient no. | Sex    | Age (y) | KPS (%) | CE on MRI | FET PET | SUV <sub>max</sub> /BG | BTv  | TACs | Initial treatment | Tumor progression | PFS (mo) | Malignant transformation | TTM (mo) | Histology at malignant transformation | Death | OS (mo) |
|-------------|--------|---------|---------|-----------|---------|------------------------|------|------|-------------------|-------------------|----------|--------------------------|----------|---------------------------------------|-------|---------|
| 1           | Male   | 32      | 90      | +         | +       | 2.4                    | 2.4  | ↓    | Chemotherapy      | +                 | 22.7     | +                        | 22.7     | Anaplastic astrocytoma                | +     | 36.0    |
| 2           | Female | 32      | 90      | –         | +       | 2.5                    | 3.1  | ↑    | Wait and see      | +                 | 39.2     | –                        | 48.9     |                                       | –     | 48.9    |
| 3           | Male   | 49      | 90      | +         | +       | 3.9                    | 18.3 | ↓    | Chemotherapy      | +                 | 25.5     | +                        | 25.5     |                                       | –     | 25.7    |
| 4           | Female | 42      | 90      | –         | +       | 2.6                    | 1.1  | ↑    | Wait and see      | –                 | 34.4     | –                        | 34.4     |                                       | –     | 34.4    |
| 5           | Female | 48      | 90      | +         | +       | 5.1                    | 27.0 | ↓    | Chemotherapy      | +                 | 15.5     | +                        | 15.5     | Anaplastic astrocytoma                | –     | 70.5    |
| 6           | Female | 69      | 80      | –         | +       | 1.6                    |      | NA   | Wait and see      | –                 | 35.7     | –                        | 35.7     |                                       | –     | 35.7    |
| 7           | Male   | 41      | 90      | –         | +       | 2.5                    | 1.5  | ↑    | Chemotherapy      | –                 | 52.2     | –                        | 52.2     |                                       | –     | 52.2    |
| 8           | Male   | 38      | 80      | –         | +       | 4.7                    | 20.5 | ↓    | Wait and see      | +                 | 10.6     | +                        | 34.8     | Anaplastic oligoastrocytoma           | –     | 56.4    |
| 9           | Male   | 42      | 80      | –         | +       | 1.9                    | 0.1  | ↑    | Chemotherapy      | –                 | 49.9     | –                        | 49.9     |                                       | –     | 49.9    |
| 10          | Male   | 27      | 90      | –         | –       |                        |      |      | Tumor resection   | +                 | 20.6     | +                        | 20.6     | Anaplastic astrocytoma                | +     | 63.7    |
| 11          | Male   | 52      | 90      | –         | +       | 3.6                    | 9.5  | ↓    | Chemotherapy      | –                 | 68.3     | –                        | 68.3     |                                       | –     | 68.3    |
| 12          | Female | 49      | 90      | –         | –       |                        |      |      | Wait and see      | –                 | 18.3     | –                        | 18.3     |                                       | –     | 18.3    |
| 13          | Male   | 29      | 90      | –         | –       |                        |      |      | Tumor resection   | +                 | 34.0     | –                        | 50.3     |                                       | –     | 50.3    |
| 14          | Female | 42      | 80      | –         | +       | 2.4                    | 0.5  | NA   | SBT               | –                 | 79.1     | –                        | 79.1     |                                       | –     | 79.1    |
| 15          | Male   | 68      | 90      | –         | –       |                        |      |      | SBT               | +                 | 11.5     | +                        | 11.5     | Glioblastoma                          | +     | 43.7    |
| 16          | Male   | 35      | 90      | –         | –       |                        |      |      | SBT               | +                 | 27.9     | +                        | 50.9     | Glioblastoma                          | –     | 72.2    |
| 17          | Female | 45      | 90      | –         | +       | 1.6                    |      | ↑    | SBT               | –                 | 36.6     | –                        | 36.6     |                                       | –     | 36.6    |
| 18          | Female | 45      | 90      | –         | +       | 2.7                    | 14.8 | NA   | Wait and see      | +                 | 14.2     | –                        | 26.7     |                                       | –     | 26.7    |
| 19          | Male   | 43      | 90      | –         | +       | 2.5                    | 7.7  | ↓    | SBT               | +                 | 15.6     | +                        | 15.6     | Anaplastic astrocytoma                | +     | 27.4    |
| 20          | Male   | 28      | 90      | –         | –       |                        |      |      | Wait and see      | –                 | 21.0     | –                        | 21.0     |                                       | –     | 21.0    |
| 21          | Male   | 47      | 90      | –         | –       |                        |      |      | Wait and see      | –                 | 26.7     | –                        | 26.7     |                                       | –     | 26.7    |
| 22          | Male   | 64      | 90      | –         | –       |                        |      |      | SBT               | +                 | 10.8     | +                        | 10.8     | Glioblastoma                          | +     | 18.3    |
| 23          | Male   | 50      | 90      | –         | +       | 2.4                    | 6.3  | ↓    | Wait and see      | +                 | 3.0      | +                        | 3.0      | Anaplastic astrocytoma                | –     | 45.0    |
| 24          | Female | 45      | 100     | –         | –       |                        |      |      | Tumor resection   | –                 | 44.9     | –                        | 44.9     |                                       | –     | 44.9    |
| 25          | Male   | 46      | 90      | –         | +       | 1.7                    |      | ↓    | Wait and see      | +                 | 2.8      | +                        | 2.8      | Glioblastoma                          | +     | 15.1    |

|    |        |    |     |   |   |     |      |    |                         |   |      |   |      |                        |   |      |
|----|--------|----|-----|---|---|-----|------|----|-------------------------|---|------|---|------|------------------------|---|------|
| 26 | Female | 38 | 90  | + | + | 2.3 | 1.0  | ↑  | Chemotherapy            | + | 20.2 | + | 20.2 | Anaplastic astrocytoma | – | 21.0 |
| 27 | Male   | 76 | 90  | + | + | 1.9 |      | ↓  | Wait and see            | + | 7.9  | + | 7.9  | Glioblastoma           | – | 30.9 |
| 28 | Female | 35 | 90  | – | + | 1.6 |      | ↑  | Chemotherapy            | + | 10.5 | + | 23.5 | Anaplastic astrocytoma | – | 23.7 |
| 29 | Male   | 55 | 90  | – | – |     |      |    | Wait and see            | + | 8.1  | + | 8.1  | Glioblastoma           | + | 22.9 |
| 30 | Female | 42 | 90  | – | – |     |      |    | Wait and see            | – | 15.9 | – | 15.9 |                        | – | 15.9 |
| 31 | Male   | 28 | 90  | – | + | 2.4 | 2.2  | ↑  | Wait and see            | + | 20.2 | – | 43.5 |                        | – | 43.5 |
| 32 | Female | 39 | 100 | – | – |     |      |    | Tumor resection         | – | 17.6 | – | 17.6 |                        | – | 17.6 |
| 33 | Male   | 25 | 100 | – | + | 1.6 |      | ↑  | Tumor resection and SBT | + | 20.5 | + | 20.5 | Anaplastic astrocytoma | – | 64.6 |
| 34 | Male   | 38 | 80  | – | + | 1.5 |      | NA | Wait and see            | – | 10.4 | – | 10.4 |                        | – | 10.4 |
| 35 | Female | 66 | 90  | – | + | 2.1 | 0.4  | ↓  | Wait and see            | + | 10.3 | + | 10.3 | Glioblastoma           | + | 24.2 |
| 36 | Male   | 33 | 90  | – | – |     |      |    | SBT                     | – | 75.1 | – | 75.1 |                        | – | 75.1 |
| 37 | Female | 58 | 90  | + | + | 2.4 | 1.5  | ↑  | Wait and see            | – | 47.0 | – | 47.0 |                        | – | 47.0 |
| 38 | Female | 49 | 90  | + | + | 3.2 | 20.0 | ↓  | Chemotherapy            | + | 5.7  | – | 34.3 |                        | – | 34.3 |
| 39 | Male   | 44 | 90  | – | – |     |      |    | Wait and see            | – | 12.6 | – | 12.6 |                        | – | 12.6 |
| 40 | Male   | 49 | 90  | – | – |     |      |    | SBT                     | + | 53.9 | + | 53.9 | Glioblastoma           | – | 63.0 |
| 41 | Female | 54 | 90  | – | – |     |      |    | Wait and see            | + | 21.6 | + | 21.6 | Glioblastoma           | – | 56.4 |
| 42 | Male   | 36 | 90  | – | – |     |      |    | Radiotherapy            | – | 31.3 | – | 31.3 |                        | – | 31.3 |
| 43 | Female | 37 | 90  | – | – |     |      |    | Chemotherapy            | – | 28.2 | – | 28.2 |                        | – | 28.2 |
| 44 | Male   | 43 | 80  | – | + | 1.5 |      | ↑  | Chemotherapy            | – | 62.0 | – | 62.0 |                        | – | 62.0 |
| 45 | Female | 36 | 70  | – | + | 2.9 | 24.8 | ↑  | Chemotherapy            | + | 8.3  | – | 46.7 |                        | – | 46.7 |
| 46 | Female | 43 | 90  | – | + | 1.7 |      | ↑  | Wait and see            | – | 53.2 | – | 53.2 |                        | – | 53.2 |
| 47 | Female | 44 | 80  | – | + | 2.4 | 0.6  | ↑  | Chemotherapy            | – | 75.4 | – | 75.4 |                        | – | 75.4 |
| 48 | Female | 45 | 90  | – | – |     |      |    | Chemotherapy            | – | 24.0 | – | 24.0 |                        | – | 24.0 |
| 49 | Male   | 47 | 70  | – | + | 2.3 | 10.5 | ↑  | Chemotherapy            | – | 59.0 | – | 59.0 |                        | – | 59.0 |
| 50 | Female | 36 | 80  | – | – |     |      |    | Tumor resection         | – | 50.1 | – | 50.1 |                        | – | 50.1 |
| 51 | Female | 42 | 90  | – | – |     |      |    | Wait and see            | – | 80.3 | – | 80.3 |                        | – | 80.3 |
| 52 | Male   | 34 | 90  | + | + | 2.4 | 9.4  | ↑  | Radiotherapy            | – | 16.6 | – | 16.6 |                        | – | 16.6 |
| 53 | Female | 29 | 90  | + | + | 1.8 |      | ↑  | Wait and see            | – | 76.0 | – | 76.0 |                        | – | 76.0 |
| 54 | Male   | 28 | 100 | – | – |     |      |    | Wait and see            | – | 22.6 | – | 22.6 |                        | – | 22.6 |
| 55 | Male   | 31 | 90  | – | – |     |      |    | Wait and see            | + | 21.7 | – | 35.5 |                        | – | 35.5 |
| 56 | Female | 40 | 100 | + | + | 2.6 | 30.0 | ↑  | Wait and see            | – | 86.8 | – | 86.8 |                        | – | 86.8 |
| 57 | Female | 23 | 90  | – | – |     |      |    | SBT                     | + | 23.7 | – | 23.7 |                        | + | 23.7 |

|    |      |    |    |   |   |     |     |   |                                        |   |      |   |      |                        |   |      |
|----|------|----|----|---|---|-----|-----|---|----------------------------------------|---|------|---|------|------------------------|---|------|
| 58 | Male | 47 | 80 | – | – |     |     |   | SBT                                    | + | 43.3 | + | 43.3 | Anaplastic astrocytoma | + | 49.1 |
| 59 | Male | 33 | 80 | + | + | 2.8 | 2.2 | ↓ | Tumor<br>resection and<br>radiotherapy | + | 19.3 | + | 19.3 | Anaplastic astrocytoma | + | 34.5 |

KPS = Karnofsky performance score; CE = contrast enhancement; BTV = biologic tumor volume; TACs = time–activity curves; PFS = progression-free survival; NA = not applicable; SBT = stereotactic brachytherapy
